# Supplementary material for: Dynamic Changes in the Subgingival Microbiome and Their Potential for Diagnosis and Prognosis of Periodontitis
Source: PubMed Central journal article supplement — mBio. 2015 Feb 17;6(1):e01926-14. doi: 10.1128/mBio.01926-14 (PMC4337560; doi:10.1128/mbio.01926-14), 2015-02-17
Supplement: mbo001152174sf2.pdf [file mbo001152174sf2.pdf]

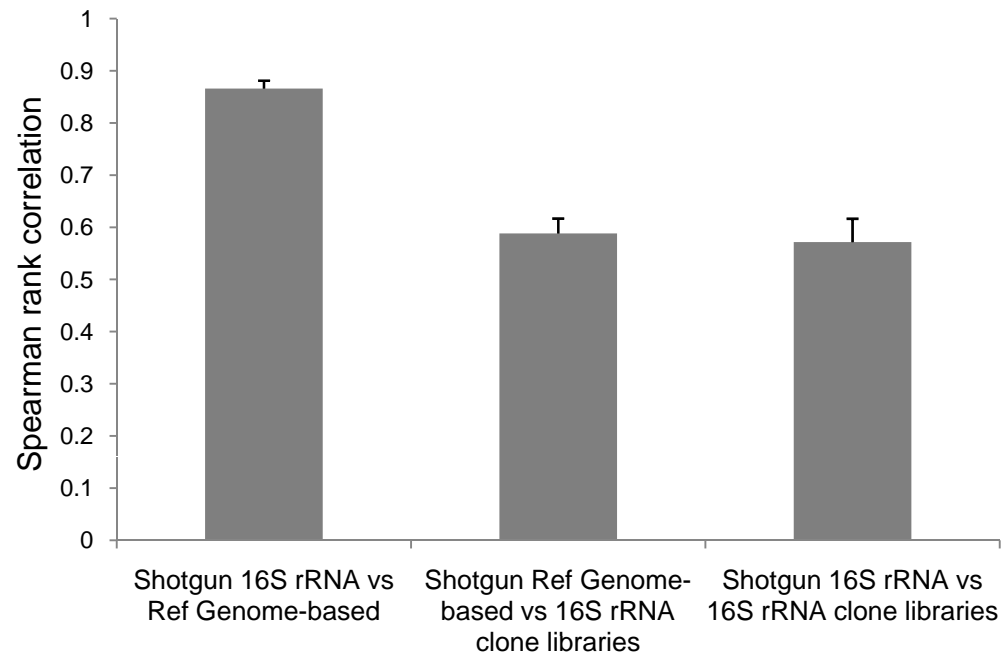

**Supplementary Figure S2.** Comparison of the taxonomic compositions determined based on three approaches. The taxonomic compositions were determined based on the shotgun 16S rRNA-based and shotgun reference genome-based (Ref Genome-based) approaches. As a validation, we performed traditional 16S rRNA clone libraries on 8 samples combined with Sanger sequencing. Data are represented as mean  $\pm$  s.e.m.
