# Supplementary material for: Dynamic Changes in the Subgingival Microbiome and Their Potential for Diagnosis and Prognosis of Periodontitis
Source: PubMed Central journal article supplement — mBio. 2015 Feb 17;6(1):e01926-14. doi: 10.1128/mBio.01926-14 (PMC4337560; doi:10.1128/mbio.01926-14), 2015-02-17
Supplement: mbo001152174sf3.pdf [file mbo001152174sf3.pdf]

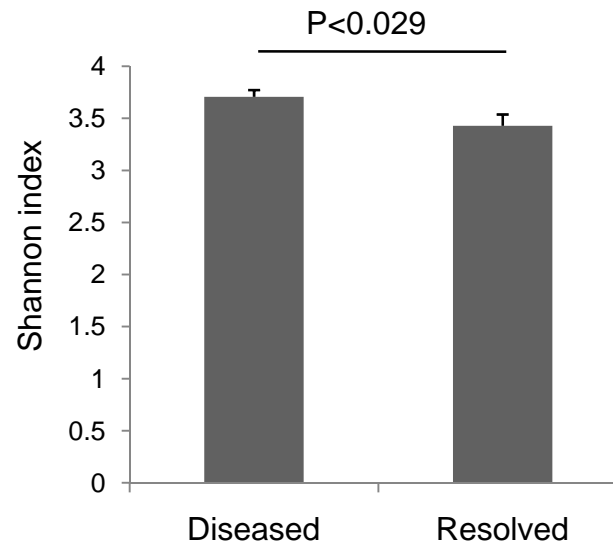

**Supplementary Figure S3.** The subgingival microbiome alpha-diversity. Data are represented as mean  $\pm$  s.e.m.
