# Supplementary material for: Dynamic Changes in the Subgingival Microbiome and Their Potential for Diagnosis and Prognosis of Periodontitis
Source: PubMed Central journal article supplement — mBio. 2015 Feb 17;6(1):e01926-14. doi: 10.1128/mBio.01926-14 (PMC4337560; doi:10.1128/mbio.01926-14), 2015-02-17
Supplement: mbo001152174sf4.pdf [file mbo001152174sf4.pdf]

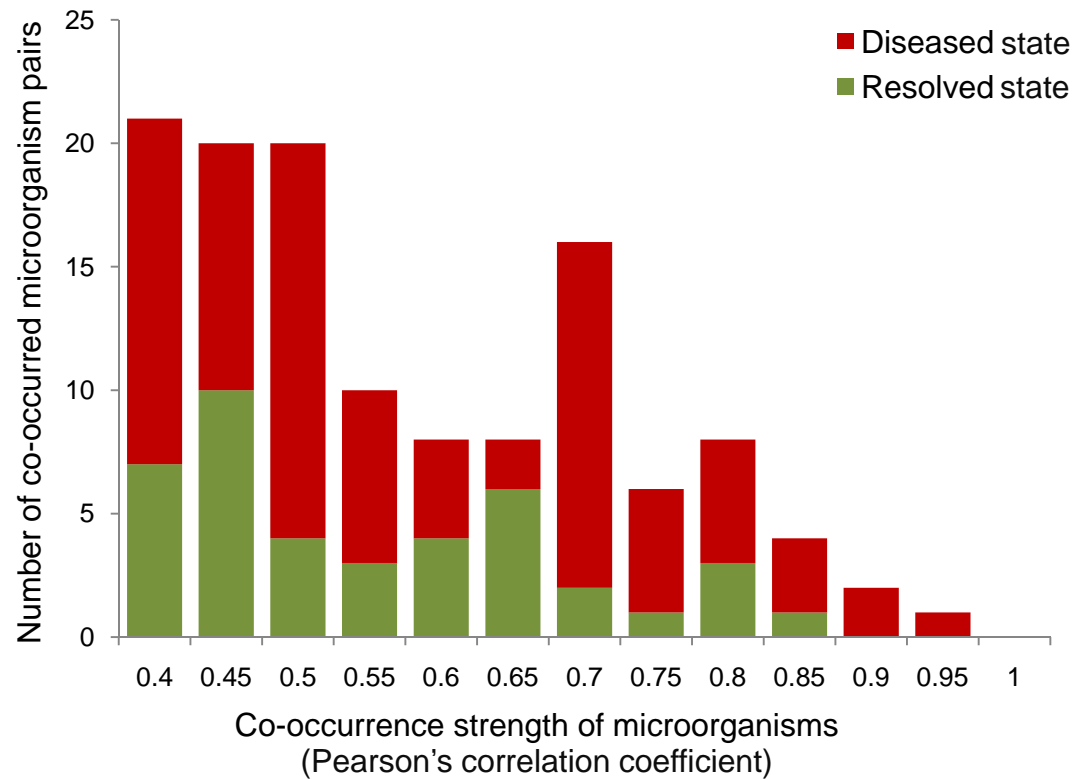

**Supplementary Figure S4.** The strength distribution of the microbial co-occurrence. The strength was determined based on the abundances of the major genera found in samples at each clinical state using a method similar to Qin *et al.* (13). The co-occurrence of subgingival microorganisms was identified if the positive correlation between the two genera with a Pearson's correlation coefficient above 0.4. The strength of the microbial co-occurrence was significantly higher at the diseased state than at the resolved state.
