# Supplementary material for: Dynamic Changes in the Subgingival Microbiome and Their Potential for Diagnosis and Prognosis of Periodontitis
Source: PubMed Central journal article supplement — mBio. 2015 Feb 17;6(1):e01926-14. doi: 10.1128/mBio.01926-14 (PMC4337560; doi:10.1128/mbio.01926-14), 2015-02-17
Supplement: mbo001152174sf5.pdf [file mbo001152174sf5.pdf]

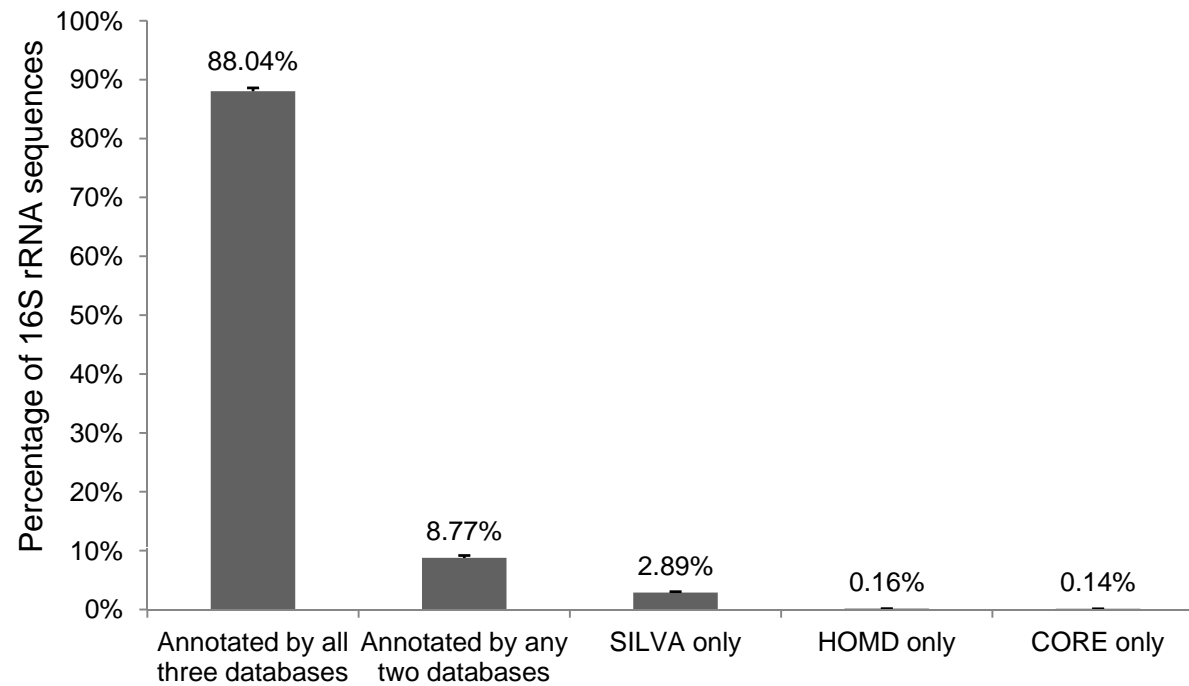

**Supplementary Figure S5.** The shotgun 16S rRNA sequences were annotated at genus level by cross referencing the alignment results from multiple databases. 96.8% of the shotgun 16S rRNA sequences could be annotated based on consistent alignment results from at least two databases. Data are represented as mean  $\pm$  s.e.m.
