# Supplementary material for: Dynamic Changes in the Subgingival Microbiome and Their Potential for Diagnosis and Prognosis of Periodontitis
Source: PubMed Central journal article supplement — mBio. 2015 Feb 17;6(1):e01926-14. doi: 10.1128/mBio.01926-14 (PMC4337560; doi:10.1128/mbio.01926-14), 2015-02-17
Supplement: mbo001152174sf7.pdf [file mbo001152174sf7.pdf]

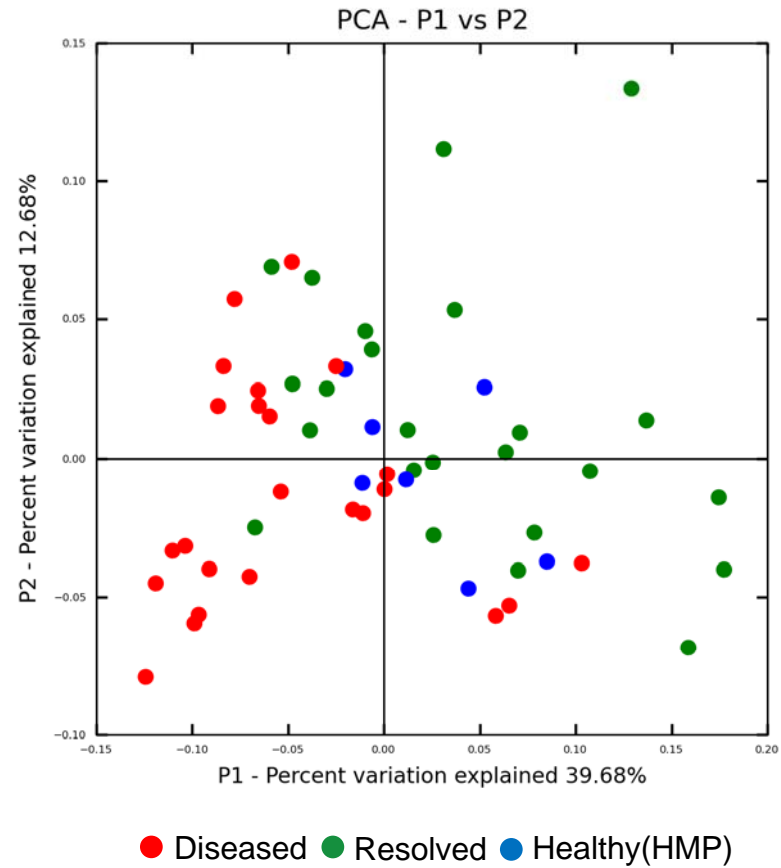

**Supplementary Figure S7.** Principal coordinate analysis of the subgingival microbiome  
Principal coordinate analysis of the subgingival microbiome in diseased samples (red), resolved samples (green) and healthy HMP samples (blue). Weighted UniFrac distances were used in the analysis.
