# Supplementary material for: Dynamic Changes in the Subgingival Microbiome and Their Potential for Diagnosis and Prognosis of Periodontitis
Source: PubMed Central journal article supplement — mBio. 2015 Feb 17;6(1):e01926-14. doi: 10.1128/mBio.01926-14 (PMC4337560; doi:10.1128/mbio.01926-14), 2015-02-17
Supplement: mbo001152174st1.pdf [file mbo001152174st1.pdf]

**Supplementary Table S1.** Taxonomic composition of the subgingival microbiome.

| Genus                     | Prevalence<br>(# samples) | Adjusted p-value | Average relative abundance<br>at the diseased state | Average relative abundance<br>at the resolved state |
|---------------------------|---------------------------|------------------|-----------------------------------------------------|-----------------------------------------------------|
| <i>Actinomyces</i>        | 47                        | 0.018            | 4.50%                                               | 8.82%                                               |
| <i>Fusobacterium</i>      | 45                        | 0.519            | 12.47%                                              | 10.94%                                              |
| <i>Capnocytophaga</i>     | 44                        | 0.177            | 4.53%                                               | 7.09%                                               |
| <i>Streptococcus</i>      | 41                        | 0.024            | 3.18%                                               | 7.86%                                               |
| <i>Prevotella</i>         | 39                        | 0.365            | 13.94%                                              | 10.81%                                              |
| <i>Porphyromonas</i>      | 38                        | 0.004            | 11.65%                                              | 2.17%                                               |
| <i>Campylobacter</i>      | 38                        | 0.546            | 1.92%                                               | 1.72%                                               |
| <i>Corynebacterium</i>    | 37                        | 0.095            | 3.48%                                               | 7.75%                                               |
| <i>Leptotrichia</i>       | 37                        | 0.929            | 4.11%                                               | 4.20%                                               |
| <i>Treponema</i>          | 34                        | 0.007            | 9.56%                                               | 2.92%                                               |
| <i>Selenomonas</i>        | 33                        | 0.519            | 2.77%                                               | 3.40%                                               |
| <i>Neisseria</i>          | 29                        | 0.365            | 2.61%                                               | 4.32%                                               |
| <i>Veillonella</i>        | 24                        | 0.193            | 1.84%                                               | 5.55%                                               |
| <i>Tannerella</i>         | 22                        | 0.002            | 2.16%                                               | 0.48%                                               |
| <i>Aggregatibacter</i>    | 21                        | 0.457            | 1.13%                                               | 1.55%                                               |
| <i>Dialister</i>          | 16                        | 0.046            | 1.37%                                               | 0.57%                                               |
| <i>Eubacterium</i>        | 16                        | 0.183            | 0.99%                                               | 0.74%                                               |
| <i>Rothia</i>             | 15                        | 0.010            | 1.28%                                               | 3.50%                                               |
| <i>Synergistes</i>        | 14                        | 0.001            | 1.89%                                               | 0.09%                                               |
| <i>Parvimonas</i>         | 14                        | 0.102            | 0.95%                                               | 0.60%                                               |
| <i>Gemella</i>            | 14                        | 0.374            | 0.70%                                               | 1.00%                                               |
| <i>Kingella</i>           | 14                        | 0.519            | 0.53%                                               | 0.68%                                               |
| <i>Haemophilus</i>        | 12                        | 0.098            | 0.47%                                               | 5.74%                                               |
| <i>Cardiobacterium</i>    | 11                        | 0.652            | 0.82%                                               | 0.67%                                               |
| <i>Filifactor</i>         | 9                         | 0.004            | 0.78%                                               | 0.05%                                               |
| <i>Catonella</i>          | 8                         | 0.365            | 0.61%                                               | 0.49%                                               |
| <i>Granulicatella</i>     | 5                         | 0.065            | 0.25%                                               | 0.61%                                               |
| <i>Actinobaculum</i>      | 5                         | 0.374            | 0.73%                                               | 0.24%                                               |
| <i>Propionibacterium</i>  | 5                         | 0.399            | 0.59%                                               | 0.34%                                               |
| <i>Bergeyella</i>         | 4                         | 0.023            | 0.18%                                               | 0.51%                                               |
| <i>Olsenella</i>          | 4                         | 0.033            | 0.34%                                               | 0.08%                                               |
| <i>Lautropia</i>          | 4                         | 0.116            | 0.10%                                               | 0.35%                                               |
| <i>Peptostreptococcus</i> | 3                         | 0.024            | 0.47%                                               | 0.12%                                               |
| <i>Oribacterium</i>       | 3                         | 0.502            | 0.24%                                               | 0.39%                                               |
| <i>Mycoplasma</i>         | 2                         | 0.018            | 0.23%                                               | 0.00%                                               |
| <i>Peptococcus</i>        | 2                         | 0.497            | 0.35%                                               | 0.24%                                               |
| <i>Eikenella</i>          | 2                         | 0.624            | 0.25%                                               | 0.21%                                               |
| <i>Shuttleworthia</i>     | 2                         | 0.885            | 0.16%                                               | 0.18%                                               |
